# Supplementary material for: Maternal Periconceptional Folic Acid Supplementation and the Risk of Non-Syndromic Oral Clefts in Offspring: A Population-Based Case-Control Study in Chengdu, China
Source: Research Square preprint supplement (doi:10.21203/rs.3.rs-136950/v1), 2021-01-08
Supplement: Supplementary file 1 [file ff3633dab716f6e5538e9e7e.docx]

**Maternal periconceptional folic acid supplementation and the risk of non-syndromic oral clefts in offspring: A population-based case-control study in Chengdu, China**

Wenli Xu 1, Ling Yi 1, Changfei Deng 1, Ziling Zhao 2, Longrong Ran 3, Zhihong Ren 3, Shunxia Zhao3, Tianjin Zhou2, Gang Zhang 2, Hanmin Liu 4,5,6*, Li Dai 1, 5,6*

1National Center for Birth Defects Monitoring, West China Second University Hospital, Sichuan University, Chengdu, Sichuan, China

2Sichuan Provincial Hospital for Women and Children, Affiliated Women and Children’s Hospital of Chengdu Medical College, Chengdu, Sichuan, China

3Chengdu Women’s & Children’s Central Hospital, Chengdu, Sichuan, China

4Pediatric Department, West China Second University Hospital, Sichuan University, Chengdu, Sichuan, China

5Key Laboratory of Birth Defects and Related Diseases of Women and Children (Sichuan University), Ministry of Education, Chengdu, Sichuan, China

6Medical Big Data Center, Sichuan University, Chengdu, Sichuan, China

* Corresponding author:

Li Dai, National Center for Birth Defects Monitoring, West China Second University Hospital, Sichuan University, No.17 Section 3 Renminnanlu, Chengdu, Sichuan 610041, China. E-mail: [daili@scu.edu.cn;](mailto:daili@scu.edu.cn;)

Hanmin Liu, Pediatric Department, West China Second University Hospital, Sichuan University, No.17 Section 3 Renminnanlu, Chengdu, Sichuan 610041, China. E-mail: liuhm@scu.edu.cn.

Funding: This work was supported by the Grants from National Key R&D Program of China (2017YFC0907304), National Natural Foundation of China (81072375), and Ministry of Health.

Disclosure statement: The authors report no conflicts of interest. The authors alone are responsible for the content and writing of this article.

**Supplementary Table 1 The associations between selected exposures and nonsyndromic oral clefts**

| **Variables** | **NsCL** | **NsCLP** | **NsCL/P** | **NsCP** |
| --- | --- | --- | --- | --- |
| **Maternal Age (years)** | |  |  |  |
| 25-34 | Ref | Ref | Ref | Ref |
| <25 | 0.98(0.71,1.34) | 1.00(0.77,1.29) | 0.99(0.81,1.21) | 0.85(0.59,1.21) |
| ≥35 | 1.22(0.74,1.94) | **1.90(1.28,2.76)** | **1.59(1.16,2.14)** | 1.15(0.63,1.97) |
| **Urban-rural classification** | |  |  |  |
| Urban | Ref | Ref | Ref | Ref |
| Rural | 1.24(0.92,1.67) | **1.29(1.01,1.65)** | **1.26(1.04,1.54)** | 0.96(0.70,1.32) |
| **Medical condition in the first trimester** | | |  |  |
| No | Ref | Ref | Ref | Ref |
| Yes | 0.92(0.55,1.43) | 0.96(0.65,1.37) | 0.94(0.69,1.26) | **0.46(0.20,0.89)** |
| **Environmental exposure in the first trimester** | | |  |  |
| No | Ref | Ref | Ref | Ref |
| Yes | 0.76(0.23,1.85) | **2.01(1.12,3.37)** | 1.51(0.90,2.41) | 1.59(0.55,3.62) |
| **Maternal BMI (kg/m2)** | |  |  |  |
| 18.5-23.9 | Ref | Ref | Ref | Ref |
| <18.5 | 1.12(0.76,1.61) | 0.81(0.58,1.12) | 0.93(0.72,1.19) | 0.77(0.48,1.19) |
| ≥24 | **1.55(1.13,2.09)** | 1.10(0.84,1.44) | **1.27(1.03,1.56)** | 1.11(0.76,1.59) |
| **Parity** |  |  |  |  |
| Nulliparous | Ref | Ref | Ref | Ref |
| Multiparous | 1.00(0.73,1.37) | **0.67(0.51,0.87)** | **0.79(0.64,0.97)** | 0.93(0.65,1.30) |
| **Infant sex** |  |  |  |  |
| Female | Ref | Ref | Ref | Ref |
| Male | **1.49(1.15,1.94)** | **1.46(1.18,1.81)** | **1.48(1.25,1.75)** | **0.71(0.53,0.95)** |
